# Supplementary material for: Proteome Characterization of BALF Extracellular Vesicles in Idiopathic Pulmonary Fibrosis: Unveiling Undercover Molecular Pathways
Source: Preprints.org preprint supplement (doi:10.20944/preprints202104.0666.v1), 2021-04-26
Supplement: Supplementary file 1 [file supplementary]

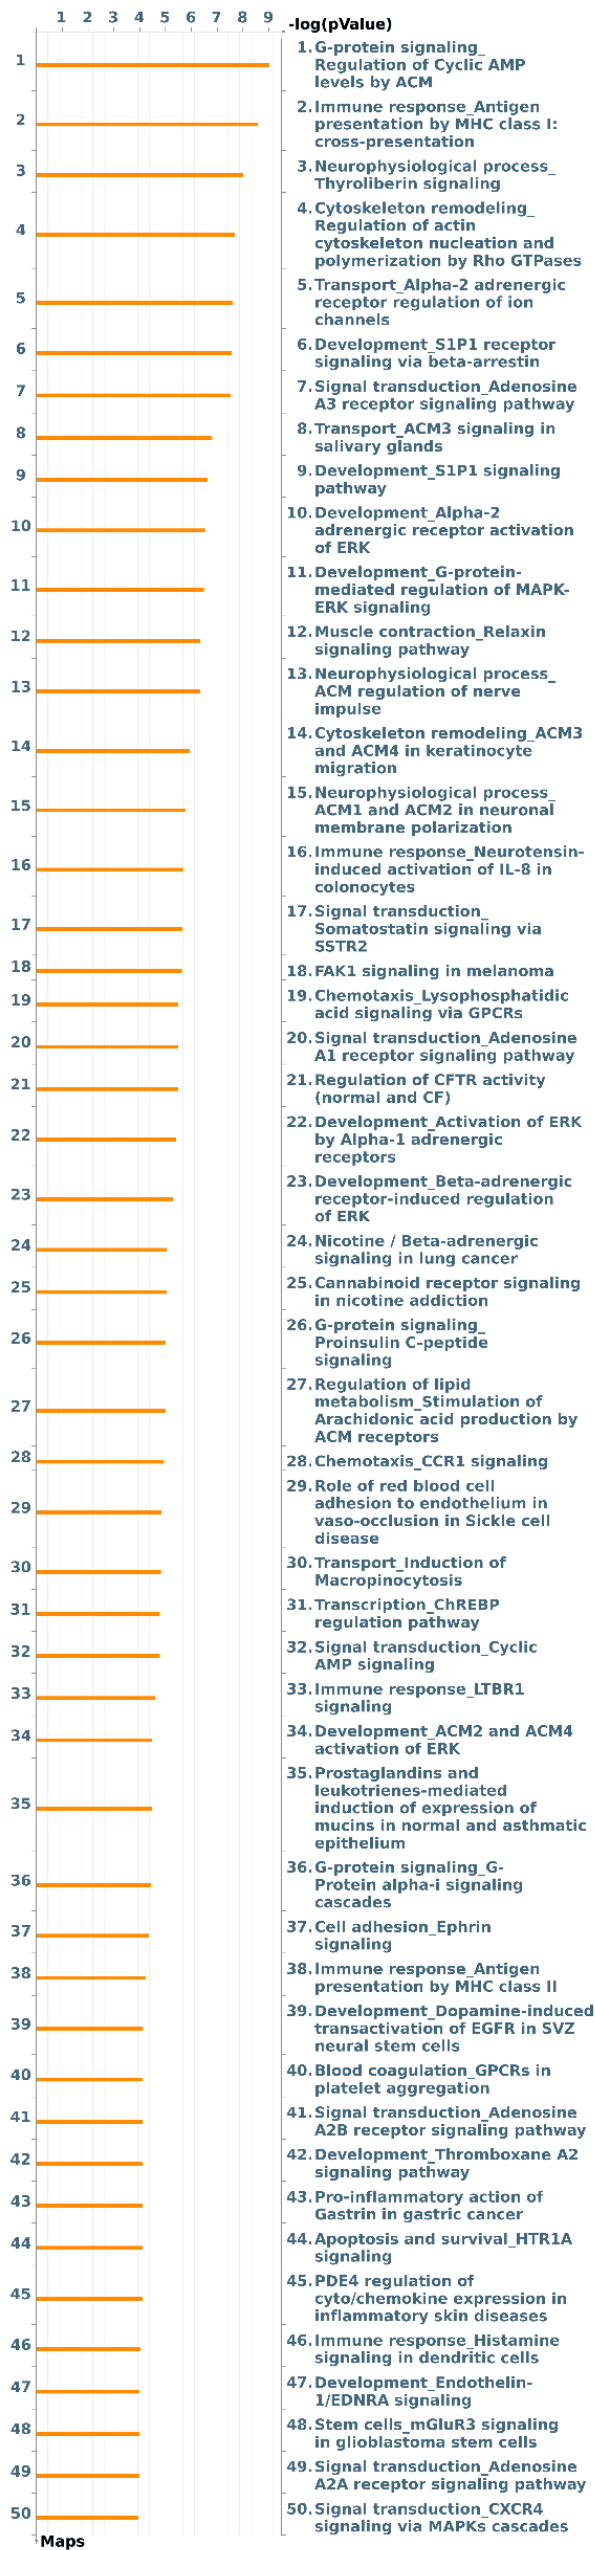

Figure S1. Pathway maps enrichment of EVs proteins from IPF BALF

Complete list of 50 most statistically significant pathway maps of vesicular proteins from IPF BALF
