# Supplementary material for: Proteome Characterization of BALF Extracellular Vesicles in Idiopathic Pulmonary Fibrosis: Unveiling Undercover Molecular Pathways
Source: Preprints.org preprint supplement (doi:10.20944/preprints202104.0666.v1), 2021-04-26
Supplement: Supplementary file 2 [file supplementary]

Archive with 3 entries (3 files):
- Supplementary Figure 1.pdf
- Supplementary Table 1.xlsx
- Supplementary Table 2.xls
