# Supplementary material for: Proteome Characterization of BALF Extracellular Vesicles in Idiopathic Pulmonary Fibrosis: Unveiling Undercover Molecular Pathways
Source: Preprints.org preprint supplement (doi:10.20944/preprints202104.0666.v1), 2021-04-26
Supplement: Supplementary file 2 [file supplementary › Supplementary Table 1.xlsx]

## Sheet: Sheet1
EVs EXCLUSIVE GENE NAMES	EVs EXCLUSIVE PROTEIN NAMES
271 proteins
MYO1B	Unconventional myosin-Ib
AHNAK	Neuroblast differentiation-associated protein AHNAK
SERPINB2	Plasminogen activator inhibitor 2
TMC5	Transmembrane channel-like protein 5
PPL	Periplakin
EPS8L1	Epidermal growth factor receptor kinase substrate 8-like protein 1
HSPG2	Basement membrane-specific heparan sulfate proteoglycan core protein;Endorepellin;LG3 peptide
EVPL	Envoplakin
FAM129B	Niban-like protein 1
NT5E	5-nucleotidase
STXBP2	Syntaxin-binding protein 2
MVP	Major vault protein
EHD4	EH domain-containing protein 4
SERPINB7	Serpin B7
STEAP4	Metalloreductase STEAP4
TAGLN	Transgelin
SLC4A1	Band 3 anion transport protein
PRKAR2A	cAMP-dependent protein kinase type II-alpha regulatory subunit
CLIC3	Chloride intracellular channel protein 3
FER1L6	Fer-1-like protein 6
CLIC4	Chloride intracellular channel protein 4
ATP13A4	Probable cation-transporting ATPase 13A4
PI3	Elafin
EHD1	EH domain-containing protein 1
GNAI2	Guanine nucleotide-binding protein G(i) subunit alpha-2
CIB1	Calcium and integrin-binding protein 1
GNA14	Guanine nucleotide-binding protein subunit alpha-14
TSG101	Tumor susceptibility gene 101 protein
ACE	Angiotensin-converting enzyme;Angiotensin-converting enzyme, soluble form
CACNA2D2	Voltage-dependent calcium channel subunit alpha-2/delta-2;Voltage-dependent calcium channel subunit alpha-2-2;Voltage-dependent calcium channel subunit delta-2
SLC44A2	Choline transporter-like protein 2
MAP1B	Microtubule-associated protein 1B;MAP1B heavy chain;MAP1 light chain LC1
FAM129A	Protein Niban
RAB11B;RAB11A	Ras-related protein Rab-11B;Ras-related protein Rab-11A
NCKAP1	Nck-associated protein 1
CNP	2,3-cyclic-nucleotide 3-phosphodiesterase
RAB2A;RAB2B	Ras-related protein Rab-2A;Ras-related protein Rab-2B
FLOT2	Flotillin-2
SLC15A2	Solute carrier family 15 member 2
ALOX15	Arachidonate 15-lipoxygenase
EHD2	EH domain-containing protein 2
CPNE3	Copine-3
TXNL1	Thioredoxin-like protein 1
FSCN1	Fascin
CAPN5	Calpain-5
TMC4	Transmembrane channel-like protein 4
CAND1	Cullin-associated NEDD8-dissociated protein 1
DES	Desmin
VAT1L	Synaptic vesicle membrane protein VAT-1 homolog-like
GNA11	Guanine nucleotide-binding protein subunit alpha-11
GNAS	Guanine nucleotide-binding protein G(s) subunit alpha isoforms short;Guanine nucleotide-binding protein G(s) subunit alpha isoforms XLas
DSC1	Desmocollin-1
PPP3CA;PPP3CB	Serine/threonine-protein phosphatase 2B catalytic subunit alpha isoform;Serine/threonine-protein phosphatase 2B catalytic subunit beta isoform
GGT1;GGT2;GGT3P	Gamma-glutamyltranspeptidase 1;Gamma-glutamyltranspeptidase 1 heavy chain;Gamma-glutamyltranspeptidase 1 light chain;Inactive gamma-glutamyltranspeptidase 2;Putative gamma-glutamyltranspeptidase 3;Putative gamma-glutamyltranspeptidase 3 heavy chain;Putative gamma-glutamyltranspeptidase 3 light chain
VILL	Villin-like protein
ATP1A1	Sodium/potassium-transporting ATPase subunit alpha-1
ATP8B1	Phospholipid-transporting ATPase IC
PSMB5	Proteasome subunit beta type-5
SYTL1	Synaptotagmin-like protein 1
SLC9A3R2	Na(+)/H(+) exchange regulatory cofactor NHE-RF2
GNAI3	Guanine nucleotide-binding protein G(k) subunit alpha
GPRC5C	G-protein coupled receptor family C group 5 member C
PRKCD	Protein kinase C delta type;Protein kinase C delta type regulatory subunit;Protein kinase C delta type catalytic subunit
GIPC1	PDZ domain-containing protein GIPC1
CTTN	Src substrate cortactin
PTPN13	Tyrosine-protein phosphatase non-receptor type 13
CYFIP1	Cytoplasmic FMR1-interacting protein 1
COPS4	COP9 signalosome complex subunit 4
STK24	Serine/threonine-protein kinase 24;Serine/threonine-protein kinase 24 36 kDa subunit;Serine/threonine-protein kinase 24 12 kDa subunit
RAB3D	Ras-related protein Rab-3D
ABCA3	ATP-binding cassette sub-family A member 3
ATP1B1	Sodium/potassium-transporting ATPase subunit beta-1
PDCD10	Programmed cell death protein 10
GNG12	Guanine nucleotide-binding protein G(I)/G(S)/G(O) subunit gamma-12
RP2	Protein XRP2
GBE1	1,4-alpha-glucan-branching enzyme
YES1	Tyrosine-protein kinase Yes
RAB7A	Ras-related protein Rab-7a
S100A16	Protein S100-A16
PAFAH1B1	Platelet-activating factor acetylhydrolase IB subunit alpha
RAB14	Ras-related protein Rab-14
CD36	Platelet glycoprotein 4
SMPDL3B	Acid sphingomyelinase-like phosphodiesterase 3b
VPS28	Vacuolar protein sorting-associated protein 28 homolog
PLSCR1	Phospholipid scramblase 1
RAB27B	Ras-related protein Rab-27B
GNAI1	Guanine nucleotide-binding protein G(i) subunit alpha-1
CPA4	Carboxypeptidase A4
C6orf132	Uncharacterized protein C6orf132
GGT5	Gamma-glutamyltransferase 5;Gamma-glutamyltransferase 5 heavy chain;Gamma-glutamyltransferase 5 light chain
RAB10	Ras-related protein Rab-10
PPP1CB;PPP1CC; PPP1CA	Serine/threonine-protein phosphatase PP1-beta catalytic subunit;Serine/threonine-protein phosphatase PP1-gamma catalytic subunit;Serine/threonine-protein phosphatase PP1-alpha catalytic subunit
ARRDC1	Arrestin domain-containing protein 1
RAB5B	Ras-related protein Rab-5B
CDHR3	Cadherin-related family member 3
CPNE2	Copine-2
PROM2	Prominin-2
MYO1G	Unconventional myosin-Ig;Minor histocompatibility antigen HA-2
BAIAP2L1	Brain-specific angiogenesis inhibitor 1-associated protein 2-like protein 1
MPP5	MAGUK p55 subfamily member 5
GNB2	Guanine nucleotide-binding protein G(I)/G(S)/G(T) subunit beta-2
VPS37B	Vacuolar protein sorting-associated protein 37B
RAB35	Ras-related protein Rab-35
SLC5A1	Sodium/glucose cotransporter 1
RAB5C	Ras-related protein Rab-5C
IST1	IST1 homolog
CYBRD1	Cytochrome b reductase 1
SLC6A14	Sodium- and chloride-dependent neutral and basic amino acid transporter B(0+)
TPR	Nucleoprotein TPR
EPX	Eosinophil peroxidase;Eosinophil peroxidase light chain;Eosinophil peroxidase heavy chain
GFPT1	Glutamine--fructose-6-phosphate aminotransferase [isomerizing] 1
RAB34	Ras-related protein Rab-34
GPR116	Probable G-protein coupled receptor 116
TMPRSS2	Transmembrane protease serine 2;Transmembrane protease serine 2 non-catalytic chain;Transmembrane protease serine 2 catalytic chain
GLIPR2	Golgi-associated plant pathogenesis-related protein 1
CAMP	Cathelicidin antimicrobial peptide;Antibacterial protein FALL-39;Antibacterial protein LL-37
ARF4	ADP-ribosylation factor 4
TACSTD2	Tumor-associated calcium signal transducer 2
ALPP;ALPI;ALPPL2	Alkaline phosphatase, placental type;Intestinal-type alkaline phosphatase;Alkaline phosphatase, placental-like
ARHGAP18	Rho GTPase-activating protein 18
PACSIN3	Protein kinase C and casein kinase substrate in neurons protein 3
PDCD6	Programmed cell death protein 6
ACSL4	Long-chain-fatty-acid--CoA ligase 4
RAB5A	Ras-related protein Rab-5A
ASS1	Argininosuccinate synthase
TGM1	Protein-glutamine gamma-glutamyltransferase K
RAB1A	Ras-related protein Rab-1A
PACSIN2	Protein kinase C and casein kinase substrate in neurons protein 2
TLR5	Toll-like receptor 5
S100A14	Protein S100-A14
RALB	Ras-related protein Ral-B
RAB8A	Ras-related protein Rab-8A
ENTPD3	Ectonucleoside triphosphate diphosphohydrolase 3
GPX4	Phospholipid hydroperoxide glutathione peroxidase, mitochondrial
NCSTN	Nicastrin
MVB12A	Multivesicular body subunit 12A
CHMP2A	Charged multivesicular body protein 2a
RHOF	Rho-related GTP-binding protein RhoF
RRAS	Ras-related protein R-Ras
VAMP8	Vesicle-associated membrane protein 8
CCT3	T-complex protein 1 subunit gamma
HSPA2	Heat shock-related 70 kDa protein 2
RAB22A	Ras-related protein Rab-22A
DLAT	Dihydrolipoyllysine-residue acetyltransferase component of pyruvate dehydrogenase complex, mitochondrial
GNAO1	Guanine nucleotide-binding protein G(o) subunit alpha
AK3	GTP:AMP phosphotransferase AK3, mitochondrial
LIN7C	Protein lin-7 homolog C
FRK	Tyrosine-protein kinase FRK
PAFAH1B2	Platelet-activating factor acetylhydrolase IB subunit beta
PTPRJ	Receptor-type tyrosine-protein phosphatase eta
QDPR	Dihydropteridine reductase
CCNY	Cyclin-Y
CD47	Leukocyte surface antigen CD47
SLC44A4	Choline transporter-like protein 4
NEDD4L;NEDD4	E3 ubiquitin-protein ligase NEDD4-like;E3 ubiquitin-protein ligase NEDD4
GRB2	Growth factor receptor-bound protein 2
RAB21	Ras-related protein Rab-21
CEP290	Centrosomal protein of 290 kDa
SCAMP2	Secretory carrier-associated membrane protein 2
TLR2	Toll-like receptor 2
SLC11A2	Natural resistance-associated macrophage protein 2
MGLL	Monoglyceride lipase
DNAJC5	DnaJ homolog subfamily C member 5
CLDN3	Claudin-3
RRAS2	Ras-related protein R-Ras2
ATP11A	Probable phospholipid-transporting ATPase IH
RAP1B	Ras-related protein Rap-1b;Ras-related protein Rap-1b-like protein
RAP2B	Ras-related protein Rap-2b
STOML3	Stomatin-like protein 3
CD82	CD82 antigen
TMEM67	Meckelin
ATP9A	Probable phospholipid-transporting ATPase IIA
AP2B1	AP-2 complex subunit beta
F11R	Junctional adhesion molecule A
WASF2	Wiskott-Aldrich syndrome protein family member 2
ENPP3	Ectonucleotide pyrophosphatase/phosphodiesterase family member 3;Alkaline phosphodiesterase I;Nucleotide pyrophosphatase
SLC2A1	Solute carrier family 2, facilitated glucose transporter member 1
CALB2	Calretinin
BDH2	3-hydroxybutyrate dehydrogenase type 2
ME1	NADP-dependent malic enzyme
MISP	Mitotic interactor and substrate of PLK1
TFG	Protein TFG
RAB6B;RAB6A	Ras-related protein Rab-6B;Ras-related protein Rab-6A
SH3BP4	SH3 domain-binding protein 4
CHMP4C	Charged multivesicular body protein 4c
BROX	BRO1 domain-containing protein BROX
RAB27A	Ras-related protein Rab-27A
CRIP2	Cysteine-rich protein 2
ARF6	ADP-ribosylation factor 6
VTA1	Vacuolar protein sorting-associated protein VTA1 homolog
LAMP3	Lysosome-associated membrane glycoprotein 3
SLC5A8	Sodium-coupled monocarboxylate transporter 1
DNAH6	Dynein heavy chain 6, axonemal
MUC21	Mucin-21
CPNE1	Copine-1
HIST1H1C;HIST1H1E; HIST1H1D;HIST1H1T; HIST1H1A	Histone H1.2;Histone H1.4;Histone H1.3;Histone H1t;Histone H1.1
AQP5	Aquaporin-5
TMEM231	Transmembrane protein 231
CDSN	Corneodesmosin
ARF3;ARF1	ADP-ribosylation factor 3;ADP-ribosylation factor 1
SUGT1	Suppressor of G2 allele of SKP1 homolog
RAB25	Ras-related protein Rab-25
RUVBL1	RuvB-like 1
RUVBL2	RuvB-like 2
SLC22A4	Solute carrier family 22 member 4
SMIM1	Small integral membrane protein 1
HLA-DQB1	HLA class II histocompatibility antigen, DQ beta 1 chain
ACP1	Low molecular weight phosphotyrosine protein phosphatase
TMEM30A	Cell cycle control protein 50A
ARF5	ADP-ribosylation factor 5
SLC1A1	Excitatory amino acid transporter 3
SLC3A2	4F2 cell-surface antigen heavy chain
TMEM30B	Cell cycle control protein 50B
ADAM10	Disintegrin and metalloproteinase domain-containing protein 10
UBL3	Ubiquitin-like protein 3
MYADM	Myeloid-associated differentiation marker
PLLP	Plasmolipin
LY6D	Lymphocyte antigen 6D
PDZK1IP1	PDZK1-interacting protein 1
S100A10	Protein S100-A10
TOLLIP	Toll-interacting protein
AQP1	Aquaporin-1
GNG5	Guanine nucleotide-binding protein G(I)/G(S)/G(O) subunit gamma-5
CYSTM1	Cysteine-rich and transmembrane domain-containing protein 1
MAL2	Protein MAL2
CLTA	Clathrin light chain A
PHACTR4	Phosphatase and actin regulator 4
MYO1F;MYO1E	Unconventional myosin-If;Unconventional myosin-Ie
NAPRT	Nicotinate phosphoribosyltransferase
BBS1	Bardet-Biedl syndrome 1 protein
RAB23	Ras-related protein Rab-23
NOS2	Nitric oxide synthase, inducible
TAOK1	Serine/threonine-protein kinase TAO1
BBS2	Bardet-Biedl syndrome 2 protein
DYNC1H1	Cytoplasmic dynein 1 heavy chain 1
ITGA3	Integrin alpha-3;Integrin alpha-3 heavy chain;Integrin alpha-3 light chain
MOB1A;MOB1B	MOB kinase activator 1A;MOB kinase activator 1B
HNMT	Histamine N-methyltransferase
MUC16	Mucin-16
ANXA13	Annexin A13
SRC	Proto-oncogene tyrosine-protein kinase Src
PRDM5	PR domain zinc finger protein 5
HLA-DRB4	HLA class II histocompatibility antigen, DR beta 4 chain
CRB3	Protein crumbs homolog 3
PLEKHS1	Pleckstrin homology domain-containing family S member 1
MYL12A;MYL12B; MYL9	Myosin regulatory light chain 12A;Myosin regulatory light chain 12B;Myosin regulatory light polypeptide 9
PMM2	Phosphomannomutase 2
SHANK2
TSTA3	GDP-L-fucose synthase
CHMP1A	Charged multivesicular body protein 1a
ABI1	Abl interactor 1
KALRN	Kalirin
CLIC2	Chloride intracellular channel protein 2
DUOXA1	Dual oxidase maturation factor 1
NTM	Neurotrimin
RHOG	Rho-related GTP-binding protein RhoG
SKP1	S-phase kinase-associated protein 1
PFN2	Profilin-2
LRRC15	Leucine-rich repeat-containing protein 15
SDCBP	Syntenin-1
HLA-DRB1	HLA class II histocompatibility antigen, DRB1-15 beta chain
MYO1C	Unconventional myosin-Ic
UGDH	UDP-glucose 6-dehydrogenase
GNB4	Guanine nucleotide-binding protein subunit beta-4
RAB8B	Ras-related protein Rab-8B
POF1B	Protein POF1B
PLCD1	1-phosphatidylinositol 4,5-bisphosphate phosphodiesterase delta-1
CYFIP2	Cytoplasmic FMR1-interacting protein 2
RAB13	Ras-related protein Rab-13
RHOC	Rho-related GTP-binding protein RhoC
ATP4A	Potassium-transporting ATPase alpha chain 1
