# Supplementary material for: Proteome Characterization of BALF Extracellular Vesicles in Idiopathic Pulmonary Fibrosis: Unveiling Undercover Molecular Pathways
Source: Preprints.org preprint supplement (doi:10.20944/preprints202104.0666.v1), 2021-04-26
Supplement: Supplementary file 2 [file supplementary › Supplementary Table 2.xls]

## Sheet: Pathway Maps
Enrichment analysis report
Enrichment by Pathway Maps					BAL EVs exclusive_genelist
#	Maps	Total	pValue	Min FDR	p-value	FDR	In Data	Network Objects from Active Data
1	G-protein signaling_Regulation of Cyclic AMP levels by ACM	45	9.37444e-10	9.6838e-07	9.37444e-10	9.6838e-07	10	G-protein alpha-11, G-protein alpha-i family, G-protein alpha-i3, G-protein alpha-i2, RAP-2B, PKC-delta, G-protein alpha-o, G-protein beta/gamma, G-protein alpha-s, G-protein alpha-q/11
2	Immune response_Antigen presentation by MHC class I: cross-presentation	99	2.63781e-09	1.36243e-06	2.63781e-09	1.36243e-06	13	Rab-10, Rab-34, ARF6, HSP70, Rab8B, Rab-7, EHD1, Rab-27A, HSPA1A, TLR2, RAB-5B, VAMP8, Rab-35
3	Neurophysiological process_Thyroliberin signaling	73	1.04503e-08	3.5984e-06	1.04503e-08	3.5984e-06	11	G-protein alpha-11, G-protein alpha-i3, G-protein alpha-i2, PKC-delta, G-protein beta/gamma, G-protein alpha-s, PKC, c-Src, GRB2, G-protein alpha-q/11, PKA-reg (cAMP-dependent)
4	Cytoskeleton remodeling_Regulation of actin cytoskeleton nucleation and polymerization by Rho GTPases	46	2.20897e-08	4.83557e-06	2.20897e-08	4.83557e-06	9	WASF subunit, RhoC, WASF2, RhoA-related, CYFIP1, RhoF (Rif), Profilin, CYFIP2, Rac1-related
5	Transport_Alpha-2 adrenergic receptor regulation of ion channels	47	2.69703e-08	4.83557e-06	2.69703e-08	4.83557e-06	9	G-protein alpha-i family, G-protein alpha-i3, G-protein alpha-i2, G-protein alpha-i1, G-protein alpha-o, G-protein beta/gamma, G-protein alpha-s, PKC, PKA-reg (cAMP-dependent)
6	Development_S1P1 receptor signaling via beta-arrestin	34	2.92306e-08	4.83557e-06	2.92306e-08	4.83557e-06	8	G-protein alpha-i family, G-protein alpha-i3, G-protein alpha-i2, G-protein alpha-i1, G-protein alpha-o, G-protein beta/gamma, c-Src, GRB2
7	Signal transduction_Adenosine A3 receptor signaling pathway	48	3.27676e-08	4.83557e-06	3.27676e-08	4.83557e-06	9	G-protein alpha-i family, G-protein alpha-i3, G-protein alpha-i2, RelA (p65 NF-kB subunit), PKC-delta, G-protein beta/gamma, PKC, Rho GTPase, G-protein alpha-q/11
8	Transport_ACM3 signaling in salivary glands	42	1.71471e-07	2.21412e-05	1.71471e-07	2.21412e-05	8	G-protein alpha-11, G-protein alpha-i family, G-protein alpha-i3, Aquaporin 5, G-protein alpha-i1, PKC, G-protein alpha-q/11, PKA-reg (cAMP-dependent)
9	Development_S1P1 signaling pathway	44	2.50954e-07	2.88039e-05	2.50954e-07	2.88039e-05	8	G-protein alpha-i family, G-protein alpha-i3, G-protein alpha-i2, G-protein alpha-i1, G-protein alpha-o, G-protein beta/gamma, c-Src, GRB2
10	Development_Alpha-2 adrenergic receptor activation of ERK	62	3.30746e-07	3.38175e-05	3.30746e-07	3.38175e-05	9	Monoglyceride lipase, G-protein alpha-i family, G-protein alpha-i3, G-protein alpha-i2, G-protein alpha-i1, G-protein alpha-o, G-protein beta/gamma, c-Src, GRB2
11	Development_G-protein-mediated regulation of MAPK-ERK signaling	46	3.60109e-07	3.38175e-05	3.60109e-07	3.38175e-05	8	G-protein alpha-i family, R-Ras, G-protein beta/gamma, G-protein alpha-s, c-Src, GRB2, G-protein alpha-q/11, PKA-reg (cAMP-dependent)
12	Muscle contraction_Relaxin signaling pathway	48	5.0758e-07	4.03331e-05	5.0758e-07	4.03331e-05	8	G-protein alpha-i family, G-protein alpha-i3, NF-kB, iNOS, G-protein alpha-o, G-protein beta/gamma, G-protein alpha-s, PKA-reg (cAMP-dependent)
13	Neurophysiological process_ACM regulation of nerve impulse	48	5.0758e-07	4.03331e-05	5.0758e-07	4.03331e-05	8	G-protein alpha-11, G-protein alpha-i family, G-protein alpha-i2, G-protein alpha-o, G-protein beta/gamma, PKC, G-protein alpha-q/11, PKA-reg (cAMP-dependent)
14	Cytoskeleton remodeling_ACM3 and ACM4 in keratinocyte migration	38	1.32205e-06	9.75485e-05	1.32205e-06	9.75485e-05	7	G-protein alpha-11, G-protein alpha-i family, G-protein alpha-i2, iNOS, G-protein alpha-o, G-protein alpha-q/11, PKA-reg (cAMP-dependent)
15	Neurophysiological process_ACM1 and ACM2 in neuronal membrane polarization	40	1.90408e-06	0.000131128	1.90408e-06	0.000131128	7	G-protein alpha-11, G-protein alpha-i3, G-protein alpha-i2, G-protein alpha-i1, G-protein alpha-o, G-protein beta/gamma, c-Src
16	Immune response_Neurotensin-induced activation of IL-8 in colonocytes	41	2.26715e-06	0.000146373	2.26715e-06	0.000146373	7	G-protein alpha-11, G-protein alpha-i family, RelA (p65 NF-kB subunit), NF-kB, G-protein beta/gamma, c-Src, GRB2
17	Signal transduction_Somatostatin signaling via SSTR2	59	2.59044e-06	0.000154163	2.59044e-06	0.000154163	8	G-protein alpha-i family, G-protein alpha-i3, NF-kB, G-protein alpha-o, G-protein beta/gamma, Rap1, c-Src, G-protein alpha-14
18	FAK1 signaling in melanoma	42	2.68629e-06	0.000154163	2.68629e-06	0.000154163	7	RelA (p65 NF-kB subunit), RhoC, WASF2, NF-kB, Syntenin 1, c-Src, GRB2
19	Chemotaxis_Lysophosphatidic acid signaling via GPCRs	129	3.76685e-06	0.000186966	3.76685e-06	0.000186966	11	G-protein alpha-i family, PKC-delta, PLC-delta 1, G-protein beta/gamma, CD36, PKC, E3KARP (NHERF2), c-Src, Rho GTPase, G-protein gamma 12, G-protein alpha-q/11
20	Signal transduction_Adenosine A1 receptor signaling pathway	62	3.80086e-06	0.000186966	3.80086e-06	0.000186966	8	G-protein alpha-i family, NF-kB, G-protein beta/gamma, SFK, PKC, c-Src, G-protein alpha-q/11, PKA-reg (cAMP-dependent)
21	Regulation of CFTR activity (normal and CF)	62	3.80086e-06	0.000186966	3.80086e-06	0.000186966	8	G-protein alpha-i family, S100A10, PRKAR2A, SHANK2, G-protein alpha-s, E3KARP (NHERF2), PKA-reg type II (cAMP-dependent), PKA-reg (cAMP-dependent)
22	Development_Activation of ERK by Alpha-1 adrenergic receptors	45	4.34987e-06	0.000204246	4.34987e-06	0.000204246	7	G-protein alpha-11, PKC-delta, PLC-delta 1, G-protein alpha-o, G-protein beta/gamma, c-Src, G-protein alpha-14
23	Development_Beta-adrenergic receptor-induced regulation of ERK	47	5.87755e-06	0.000263978	5.87755e-06	0.000263978	7	G-protein alpha-i family, RAP-2B, G-protein beta/gamma, G-protein alpha-s, c-Src, GRB2, PKA-reg (cAMP-dependent)
24	Nicotine / Beta-adrenergic signaling in lung cancer	34	1.01117e-05	0.000417816	1.01117e-05	0.000417816	6	G-protein alpha-i family, G-protein beta/gamma, G-protein alpha-s, c-Src, GRB2, PKA-reg (cAMP-dependent)
25	Cannabinoid receptor signaling in nicotine addiction	34	1.01117e-05	0.000417816	1.01117e-05	0.000417816	6	Monoglyceride lipase, G-protein alpha-i family, G-protein alpha-i3, G-protein alpha-i2, G-protein alpha-i1, G-protein beta/gamma
26	G-protein signaling_Proinsulin C-peptide signaling	52	1.17354e-05	0.000452922	1.17354e-05	0.000452922	7	G-protein alpha-i family, ATP1A1, ATP1B1, NF-kB, PKC-delta, G-protein beta/gamma, c-Src
27	Regulation of lipid metabolism_Stimulation of Arachidonic acid production by ACM receptors	72	1.18382e-05	0.000452922	1.18382e-05	0.000452922	8	Monoglyceride lipase, G-protein alpha-11, G-protein alpha-i3, ARF6, ADAM10, G-protein beta/gamma, PKC, c-Src
28	Chemotaxis_CCR1 signaling	53	1.3351e-05	0.000492558	1.3351e-05	0.000492558	7	G-protein alpha-i family, NF-kB, PKC-delta, G-protein alpha-o, G-protein beta/gamma, c-Src, G-protein alpha-14
29	Role of red blood cell adhesion to endothelium in vaso-occlusion in Sickle cell disease	37	1.68366e-05	0.000599731	1.68366e-05	0.000599731	6	RAP-1B, G-protein alpha-i family, CD47, CD36, c-Src, PKA-reg (cAMP-dependent)
30	Transport_Induction of Macropinocytosis	76	1.77196e-05	0.000610146	1.77196e-05	0.000610146	8	Rab-5A, RhoG, G-protein alpha-i family, ARF6, WASF2, G-protein beta/gamma, PKC, c-Src
31	Transcription_ChREBP regulation pathway	23	1.96886e-05	0.000637412	1.96886e-05	0.000637412	5	G-protein alpha-i family, Acyl-CoA synthetase, G-protein beta/gamma, G-protein alpha-s, PKA-reg (cAMP-dependent)
32	Signal transduction_Cyclic AMP signaling	38	1.97456e-05	0.000637412	1.97456e-05	0.000637412	6	G-protein alpha-i family, PKC-delta, G-protein beta/gamma, G-protein alpha-s, PKC, PKA-reg (cAMP-dependent)
33	Immune response_LTBR1 signaling	60	3.06151e-05	0.000958346	3.06151e-05	0.000958346	7	YES, G-protein alpha-i family, iNOS, PKC-delta, G-protein beta/gamma, PKC, G-protein alpha-q/11
34	Development_ACM2 and ACM4 activation of ERK	43	4.09692e-05	0.00120918	4.09692e-05	0.00120918	6	G-protein alpha-i family, G-protein alpha-i2, PKC-delta, G-protein alpha-o, G-protein beta/gamma, GRB2
35	Prostaglandins and leukotrienes-mediated induction of expression of mucins in normal and asthmatic epithelium	43	4.09692e-05	0.00120918	4.09692e-05	0.00120918	6	G-protein alpha-i family, NF-kB, G-protein beta/gamma, G-protein alpha-s, G-protein alpha-q/11, PKA-reg (cAMP-dependent)
36	G-protein signaling_G-Protein alpha-i signaling cascades	27	4.49863e-05	0.00129086	4.49863e-05	0.00129086	5	G-protein alpha-i family, G-protein beta/gamma, c-Src, GRB2, PKA-reg (cAMP-dependent)
37	Cell adhesion_Ephrin signaling	45	5.33893e-05	0.00149057	5.33893e-05	0.00149057	6	G-protein alpha-i family, Kalirin, FAP-1, ADAM10, c-Src, GRB2
38	Immune response_Antigen presentation by MHC class II	118	7.0818e-05	0.00192513	7.0818e-05	0.00192513	9	CLEC10A, MHC class II beta chain, R-Ras, Rab-7, PKC-delta, Dynein 1, cytoplasmic, heavy chain, TLR2, PKC, MYO1E
39	Development_Dopamine-induced transactivation of EGFR in SVZ neural stem cells	31	9.0177e-05	0.00224677	9.0177e-05	0.00224677	5	G-protein alpha-i family, G-protein beta/gamma, PKC, c-Src, GRB2
40	Blood coagulation_GPCRs in platelet aggregation	71	9.174e-05	0.00224677	9.174e-05	0.00224677	7	RAP-1B, G-protein alpha-i family, G-protein alpha-i2, G-protein beta/gamma, Calmyrin, G-protein alpha-s, PKA-reg (cAMP-dependent)
41	Signal transduction_Adenosine A2B receptor signaling pathway	71	9.174e-05	0.00224677	9.174e-05	0.00224677	7	RAP-1B, G-protein beta/gamma, G-protein alpha-s, PKC, E3KARP (NHERF2), G-protein alpha-q/11, PKA-reg (cAMP-dependent)
42	Development_Thromboxane A2 signaling pathway	50	9.7875e-05	0.00224677	9.7875e-05	0.00224677	6	RAP-1B, G-protein alpha-i family, G-protein alpha-s, PKC, c-Src, PKA-reg (cAMP-dependent)
43	Pro-inflammatory action of Gastrin in gastric cancer	50	9.7875e-05	0.00224677	9.7875e-05	0.00224677	6	RelA (p65 NF-kB subunit), PAI2, PKC-delta, c-Src, GRB2, G-protein alpha-q/11
44	Apoptosis and survival_HTR1A signaling	50	9.7875e-05	0.00224677	9.7875e-05	0.00224677	6	G-protein alpha-i family, NF-kB, G-protein beta/gamma, c-Src, GRB2, PKA-reg (cAMP-dependent)
45	PDE4 regulation of cyto/chemokine expression in inflammatory skin diseases	50	9.7875e-05	0.00224677	9.7875e-05	0.00224677	6	G-protein alpha-i family, G-protein alpha-i2, RelA (p65 NF-kB subunit), G-protein alpha-i1, iNOS, PKA-reg (cAMP-dependent)
46	Immune response_Histamine signaling in dendritic cells	51	0.000109554	0.00246019	0.000109554	0.00246019	6	G-protein alpha-i family, RelA (p65 NF-kB subunit), G-protein beta/gamma, G-protein alpha-s, G-protein alpha-q/11, PKA-reg (cAMP-dependent)
47	Development_Endothelin-1/EDNRA signaling	52	0.000122313	0.00257855	0.000122313	0.00257855	6	G-protein alpha-i family, PKC-delta, G-protein alpha-s, c-Src, GRB2, G-protein alpha-q/11
48	Stem cells_mGluR3 signaling in glioblastoma stem cells	52	0.000122313	0.00257855	0.000122313	0.00257855	6	G-protein alpha-i family, G-protein beta/gamma, SLC1A1/EAAT3, c-Src, GRB2, PKA-reg (cAMP-dependent)
49	Signal transduction_Adenosine A2A receptor signaling pathway	52	0.000122313	0.00257855	0.000122313	0.00257855	6	RelA (p65 NF-kB subunit), ARF6, G-protein alpha-s, SFK, c-Src, PKA-reg (cAMP-dependent)
50	Signal transduction_CXCR4 signaling via MAPKs cascades	53	0.000136223	0.00281436	0.000136223	0.00281436	6	G-protein alpha-i family, G-protein alpha-i2, RelA (p65 NF-kB subunit), Cortactin, G-protein beta/gamma, c-Src

## Sheet: Info
Info
General
Date	2021-03-01
Server	portal.genego.com
Version	20.4.70300
Name	Laura
Login	siena-luddi
Workflow Settings
Type	Enrichment
Signals	both
Distribution	intersection
Sorting method	statistically significant
Active Data
Name	Type	Size		Threshold	0
BAL EVs exclusive_genelist	General Experiment	258		P-value	1
